# Supplementary material for: Biological properties of almond proteins produced by aqueous and enzyme-assisted aqueous extraction processes from almond cake
Source: PubMed Central journal article supplement (PMC7331752; doi:10.1038/s41598-020-67682-3), 2020-07-02
Supplement: 41598_2020_67682_MOESM1_ESM.pdf [file 41598_2020_67682_MOESM1_ESM.pdf]

Supplementary Information for:

**Biological properties of almond proteins produced by aqueous and enzyme-assisted aqueous extraction processes from almond  
cake**

Thaiza S. P. de Souza<sup>1,2</sup>, Fernanda F. G. Dias<sup>1</sup>, Joana Paula S. Oliveira<sup>2</sup>, Juliana M. L. N. de Moura Bell<sup>1,3</sup>, Maria Gabriela B. Koblitz<sup>2</sup>

<sup>1</sup>Department of Food Science and Technology, University of California, Davis, One Shields Avenue, Davis, CA, 95616, United States

<sup>2</sup>Food and Nutrition Graduate Program, Federal University of the State of Rio de Janeiro, Rio de Janeiro, RJ, 22290-240, Brazil

<sup>3</sup>Biological and Agricultural Engineering, University of California, Davis, One Shields Avenue, Davis, CA, 95616, United States

TABLE S1: Summary of resultant antioxidant peptides from the major almond protein subunits after subtilisin digestion *in silico* using BIOPEP database

| Amandin subunit | ID   | Sequence | Location  | Name                                                                 | Function                | Activity      | MI Mass  | Chemical mass |
|-----------------|------|----------|-----------|----------------------------------------------------------------------|-------------------------|---------------|----------|---------------|
| Prunin-1        | 3317 | HL       | [81-82]   | *                                                                    | Antioxidative           | Antioxidative | 268.1420 | 268.3020      |
|                 | 7873 | IY       | [92-93]   | peptide from soybean protein isolates: beta-conglycinin and glycinin | Antioxidative           | Antioxidative | 294.1470 | 294.3300      |
|                 | 8037 | PWH      | [429-431] | synthetic peptide                                                    | *                       | Antioxidative | 438.1890 | 438.4720      |
|                 | 8224 | VY       | [439-440] | antioxidative peptide                                                | Free radical scavenging | Antioxidative | 280.1310 | 280.3030      |
| Prunin-2        | 3317 | HL       | [72-73]   | *                                                                    | Antioxidative           | Antioxidative | 268.1420 | 268.3020      |
|                 | 7873 | IY       | [83-84]   | peptide from soybean protein isolates: beta-conglycinin and glycinin | Antioxidative           | Antioxidative | 294.1470 | 294.3300      |
|                 | 8224 | VY       | [386-387] | antioxidative peptide                                                | Free radical scavenging | Antioxidative | 280.1310 | 280.3030      |

H – histidine; L – leucin; I – isoleucine; Y – tyrosine; P – proline; W – tryptophan; V – valine. Digestion simulation was conducted with subtilisin in the BIOPEP database <sup>1</sup>

TABLE S2: Overview of the presence of specific amino-acids suggested as important requirement for the  $\alpha$ -glucosidase inhibition activity

| Amandin subunit | Sequencie    | R, L, S, T or Y at N-terminus | A or M at C-terminus | P close to C-terminus |
|-----------------|--------------|-------------------------------|----------------------|-----------------------|
| Prunin-1        | QQRRA        | no match                      | <b>A</b>             | no match              |
|                 | <b>RAL</b>   | <b>R</b>                      | no match             | no match              |
|                 | <b>RNGIY</b> | <b>R</b>                      | no match             | no match              |
|                 | <b>RQL</b>   | <b>R</b>                      | no match             | no match              |
| Prunin-2        | IPQNHA       | no match                      | <b>A</b>             | no match              |
|                 | <b>RADF</b>  | <b>R</b>                      | no match             | no match              |
|                 | <b>RAL</b>   | <b>R</b>                      | no match             | no match              |
|                 | <b>RIS</b>   | <b>R</b>                      | no match             | no match              |
|                 | <b>RPS</b>   | <b>R</b>                      | no match             | no match              |
|                 | <b>RQHIF</b> | <b>T</b>                      | no match             | no match              |
|                 | <b>TNTL</b>  | <b>T</b>                      | no match             | no match              |
|                 | <b>TPHW</b>  | <b>T</b>                      | no match             | no match              |
|                 | <b>NPS</b>   | no match                      | no match             | <b>P</b>              |
|                 | <b>RPS</b>   | no match                      | no match             | <b>P</b>              |

A – alanine; M – methionine; P – proline; R – arginine; K – lysine; S – serine; T – threonine; Y – tyrosine. The criteria used was suggested by Ibrahim *et al.*<sup>2</sup>, that proposed the structural requirements for  $\alpha$ -glucosidase inhibition as tri – to hexapeptides with serine S, T, Y, L or A as the ultimate N-terminal residue and P preferably at the penultimate C- terminal position while A or M at ultimate C-terminal position.

TABLE S3: Overview of the presence of specific amino-acids suggested as important requirement for the lipase inhibition activity

| Amandin subunit | Sequence      | Hydrophobicity (%) | Hydrophobic residues |
|-----------------|---------------|--------------------|----------------------|
| Prunine-1       | <b>VAIPAG</b> | 83.33              | A, P, G              |
|                 | <b>MAKAF</b>  | 80.00              | A, F                 |
|                 | <b>AQAL</b>   | 75.00              | A, L                 |
|                 | <b>RAL</b>    | 66.67              | A, L                 |
|                 | <b>MANGL</b>  | 60.00              | M, A, G, L           |
|                 | <b>NAPQL</b>  | 60.00              | A, P, L              |
|                 | <b>GA</b>     | 50.00              | G, A                 |
| Prunine-2       | <b>L</b>      | 100.00             | L                    |
|                 | <b>W</b>      | 100.00             | W                    |
|                 | <b>AQAL</b>   | 75.00              | A, L                 |
|                 | <b>ARL</b>    | 66.67              | A, L                 |
|                 | <b>PAG</b>    | 66.67              | A, G                 |
|                 | <b>RAL</b>    | 66.67              | A, L                 |
|                 | <b>VNAPQL</b> | 66.67              | A, P, L              |
|                 | <b>AG</b>     | 50.00              | A, G                 |
|                 | <b>GA</b>     | 50.00              | A, G                 |
|                 | <b>QNAF</b>   | 50.00              | A, F                 |
|                 | <b>RADF</b>   | 50.00              | A, F                 |

A – alanine; L – leucine; P – proline; F – phenylalanine; G – glycine; M – methionine; W – tryptophan. The criteria used was suggested by Ngoh et al. <sup>3</sup>, that proposed the presence of hydrophobic residues as characteristic of a lipase inhibitor. To evaluate the hydrophobicity of the sequences, the platform: Peptide Hydrophobicity/Hydrophilicity Analysis Tool, was used.

Supplementary References:

1. Minkiewicz, P., Iwaniak, A. & Darewicz, M. BIOPEP-UWM Database of Bioactive Peptides: Current Opportunities. *Int. J. Mol. Sci.* **20**, 2–23 (2019).
2. Ibrahim, M. A., Bester, M. J., Neitz, A. W. H. & Gaspar, A. R. M. Structural properties of bioactive peptides with  $\alpha$ -glucosidase inhibitory activity. *Chem Biol Drug Des* **91**, 370–379 (2018).
3. Ngoh, Y.-Y. & Gan, C.-Y. Enzyme-assisted extraction and identification of antioxidative and  $\alpha$ -amylase inhibitory peptides from Pinto beans (*Phaseolus vulgaris* cv. Pinto). *Food Chem* **190**, 331–337 (2016).
