# Supplementary material for: Biological properties of almond proteins produced by aqueous and enzyme-assisted aqueous extraction processes from almond cake
Source: PubMed Central journal article supplement (PMC7331752; doi:10.1038/s41598-020-67682-3), 2020-07-02

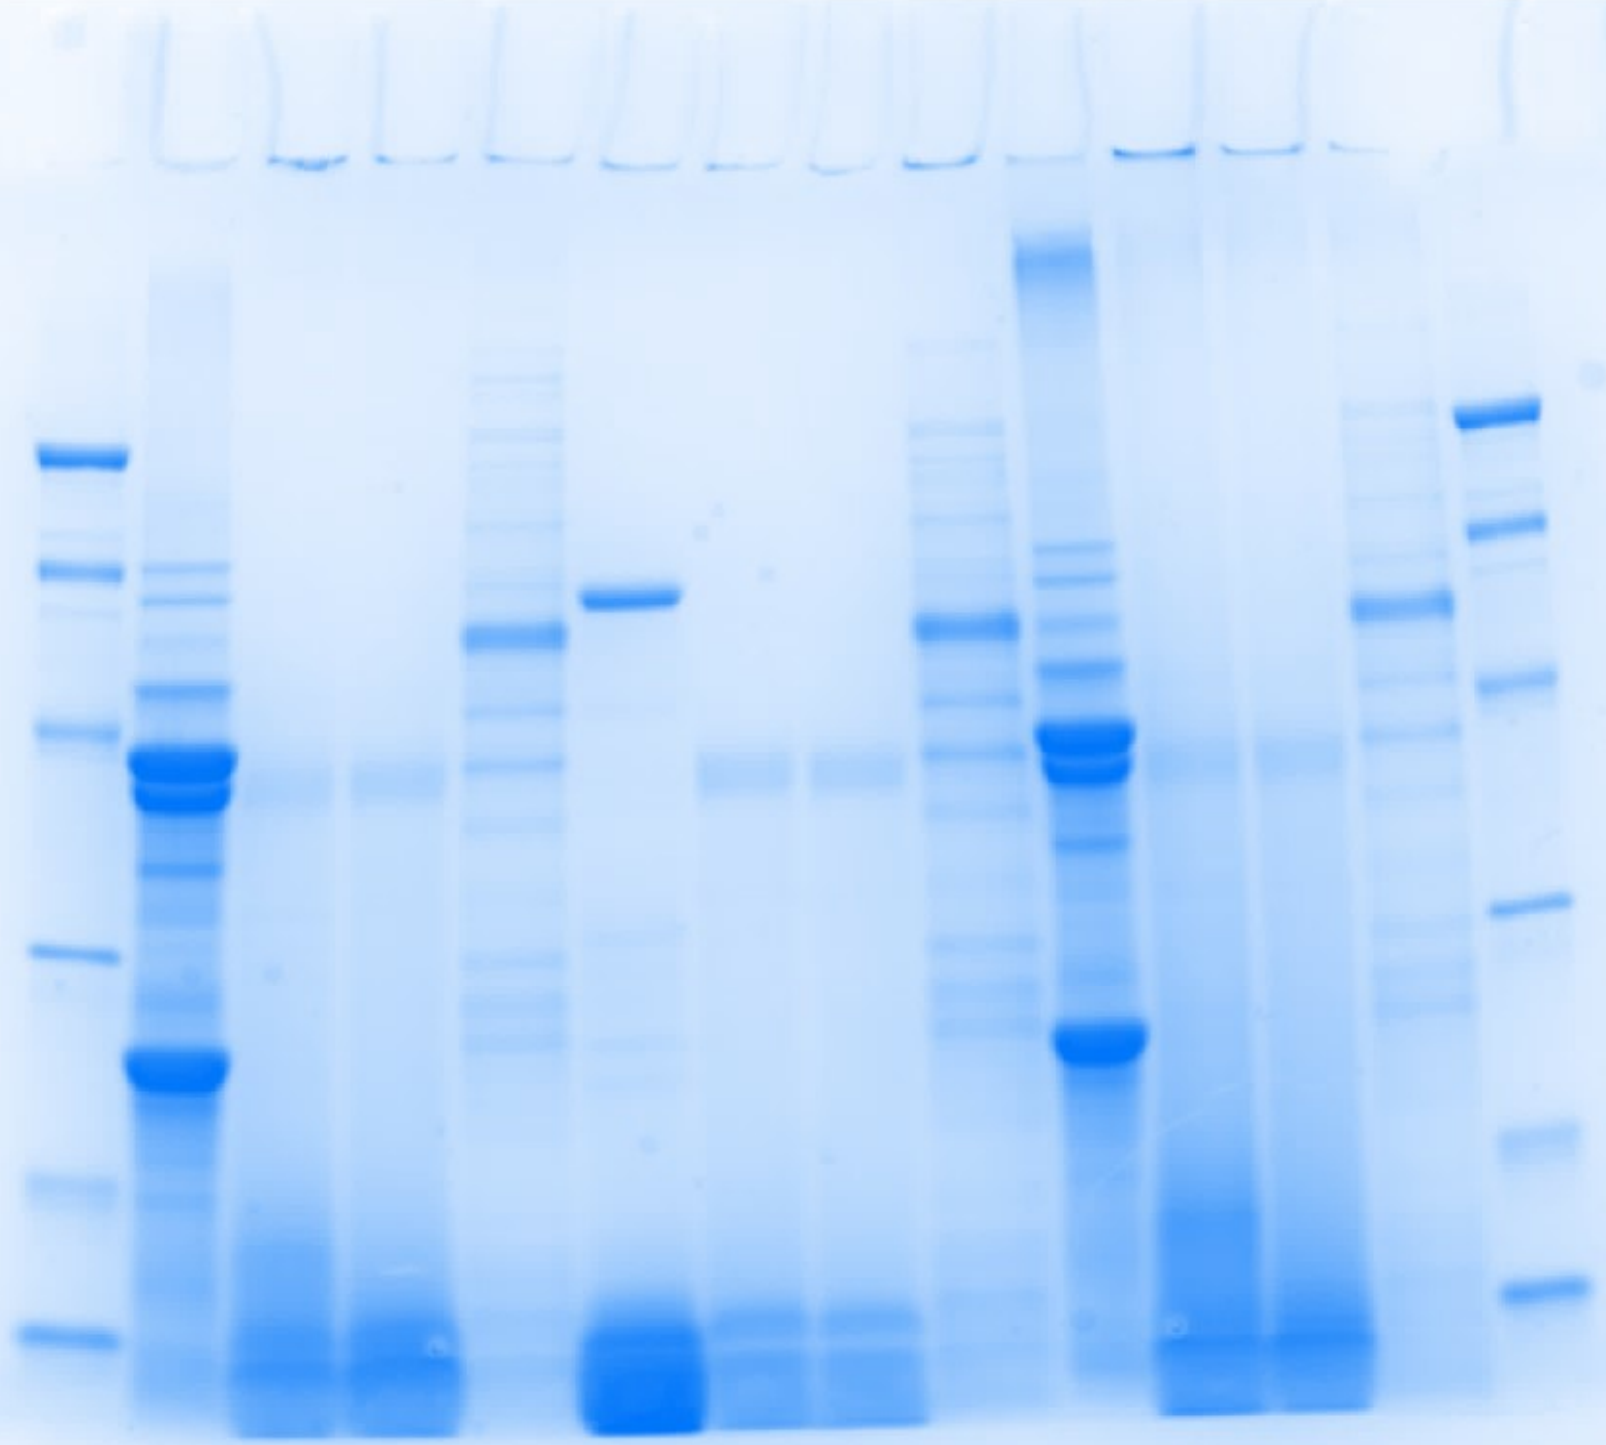

Supplement: 41598_2020_67682_MOESM2_ESM.pdf [file 41598_2020_67682_MOESM2_ESM.pdf]
